# Supplementary material for: Comparison of Intravenous Microdialysis and Standard Plasma Sampling for Monitoring of Vancomycin and Meropenem Plasma Concentrations—An Experimental Porcine Study
Source: MDPI journal article supplement (doi:10.3390/antibiotics12040791), 2023-04-21
Supplement: s1 [file s1]

File S1. The principle of a clinical standard homogeneous enzyme immunoassay method for vancomycin.

**Test principle: Homogeneous enzyme immunoassay technique (EMIT)**

**No drug in the sample**

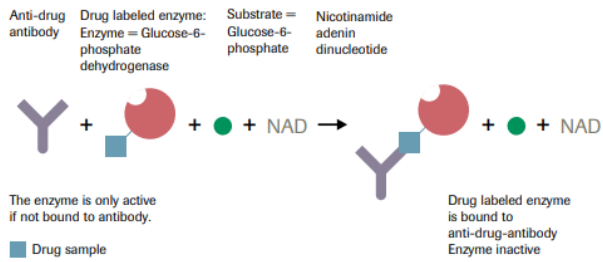

**Drug in the sample**

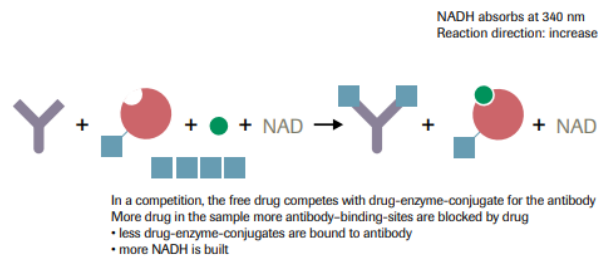

- The assay is based on competition between drug in the sample and drug labeled with the enzyme glucose-6-phosphate dehydrogenase (G6PDH) for antibody binding sites
- Enzyme activity decreases upon binding to the antibody, so the drug concentration in the sample can be measured in terms of enzyme activity
- Active enzyme converts oxidized NAD to NADH, resulting in an absorbance change that is measured spectrophotometrically
